# Supplementary material for: Wet-Induced Fabrication of Heterogeneous Hump-on-String Fibers
Source: MDPI journal article supplement (doi:10.3390/ma8074249), 2015-07-13
Supplement: s1 [file s1]

## Supplementary Materials

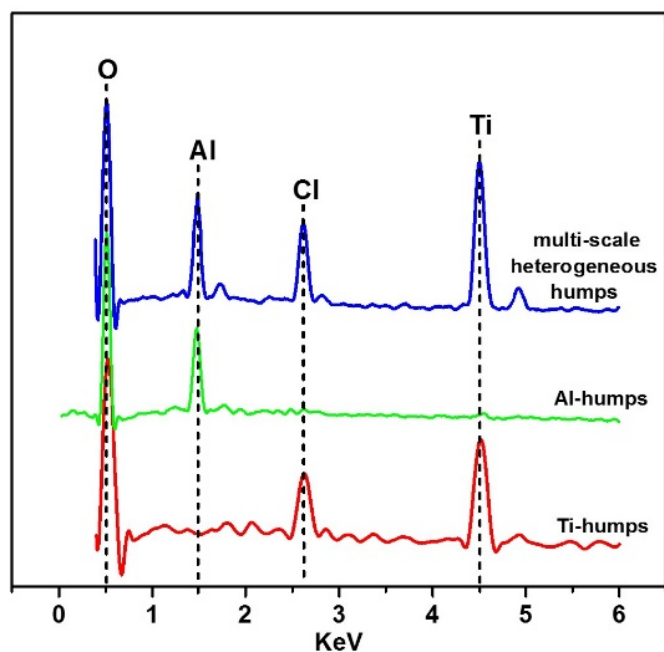

**Figure S1.** EDS results of Ti-humps; Al-humps and humps on MHHFs.

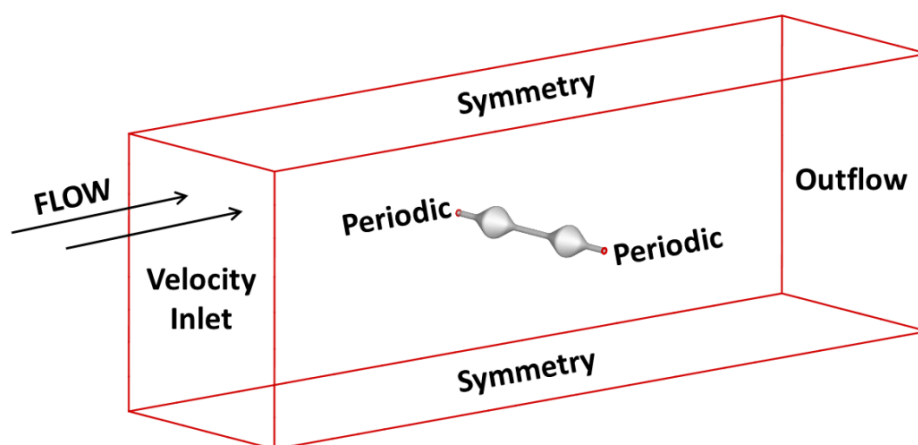

**Figure S2.** Sketch of computational domain and boundary conditions.
